# Supplementary material
Source: PubMed Central journal article supplement (PMC5623633)
Supplement: NIHMS885519-supplement.pdf [file NIHMS885519-supplement.pdf]

## Suppl Fig. 1

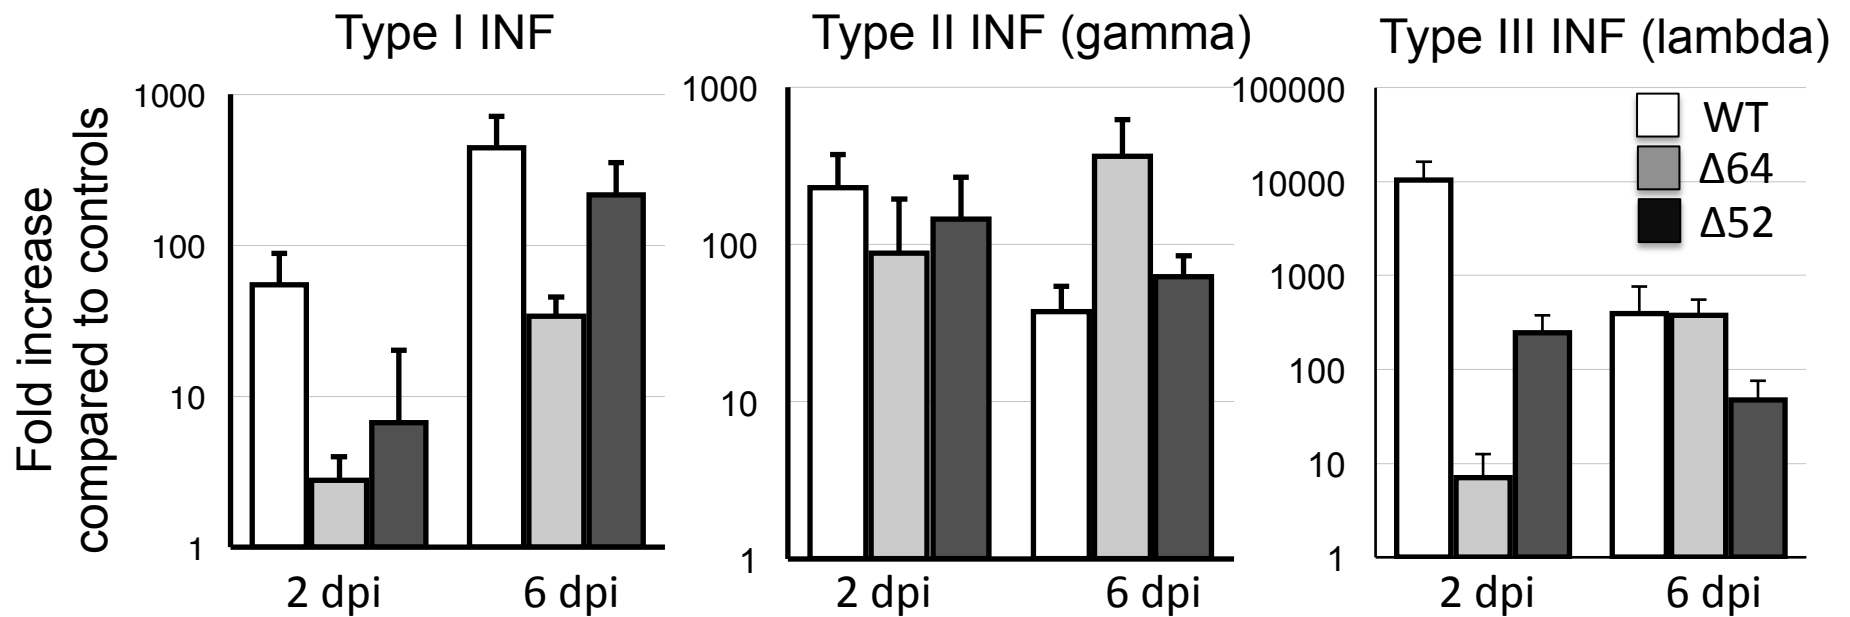

**Supl Fig. 1: Changes in expression by RT-qPCR of type I, II and III IFN genes in tadpole PLs during infection with  $\Delta 52$ L- or  $\Delta 64$ R-FV3 compared to WT-FV3.** Outbred pre-metamorphic tadpoles (10-6 individuals per group) were infected by i.p. injection of  $1 \times 10^4$  PFU of each virus type for 2 and 6 days (dpi). Results are average  $\pm$  SEM fold increase relative to uninfected controls. \*\*;  $P < 0.001$  and \*;  $P < 0.05$  significant differences between WT- and KO-FV3 using one-way ANOVA test and Tukey's post hoc test.

## Supplementary Fig. 2

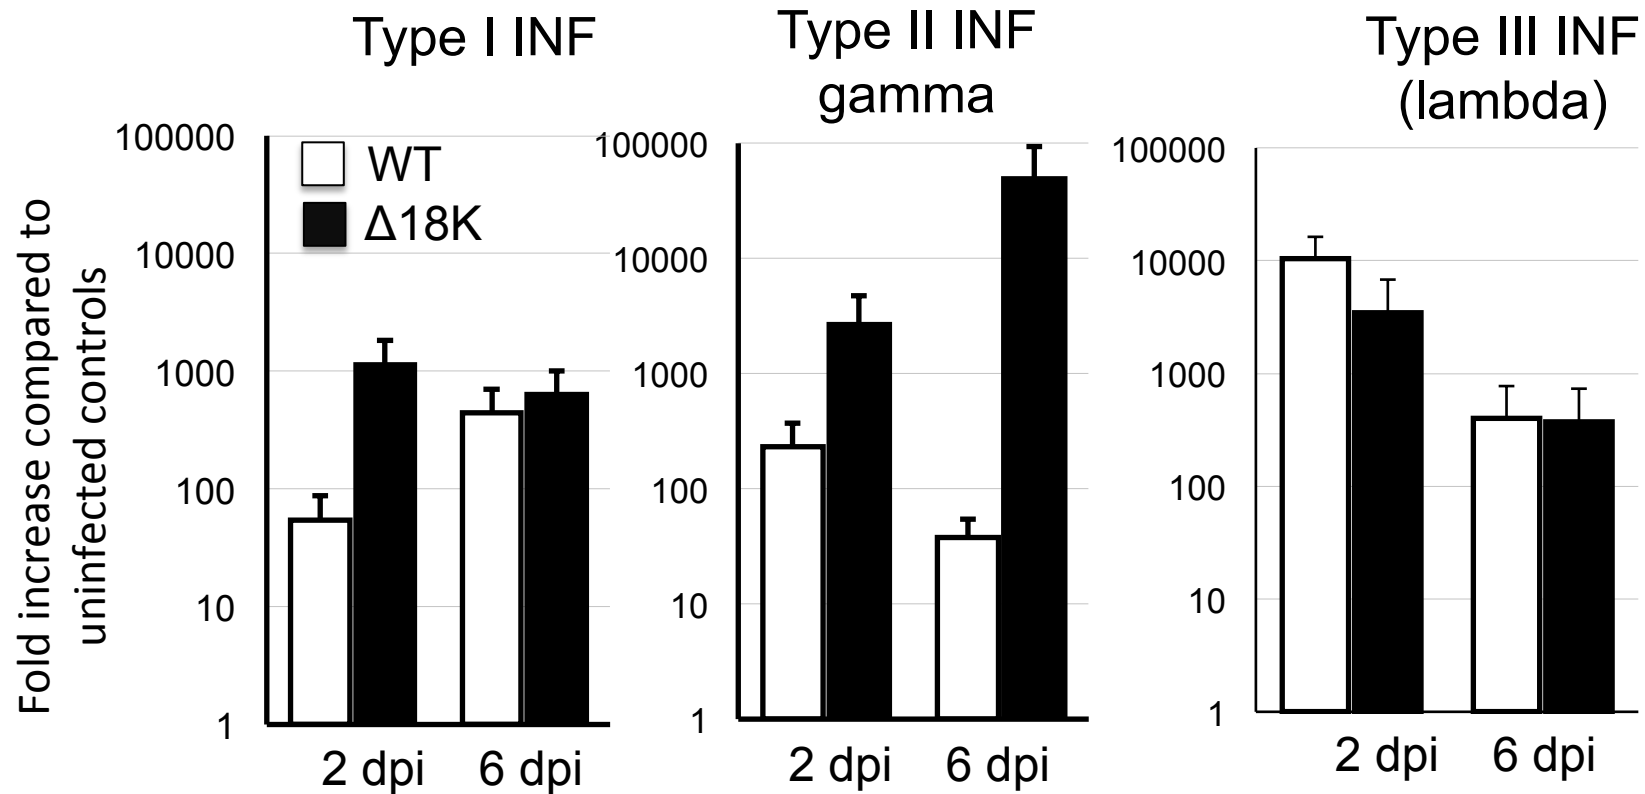

**Supl Fig. 2: Changes in expression by RT-PCR of type I, II and III IFN genes in tadpole PLs during infection with Δ18K-FV3 compared to WT-FV3.** Outbred pre-metamorphic tadpoles (10-6 individuals per group) were infected by i.p. injection of  $1 \times 10^4$  PFU of each virus type for 2 and 6 days (dpi). Results are average  $\pm$  SEM fold increase relative to uninfected controls. \*\*;  $P < 0.001$  and \*;  $P < 0.05$  significant differences between WT- and KO-FV3 using one-way ANOVA test and Tukey's post hoc test.

## Suppl Fig. 3

### Kidney Viral Load in Adults at 6 dpi

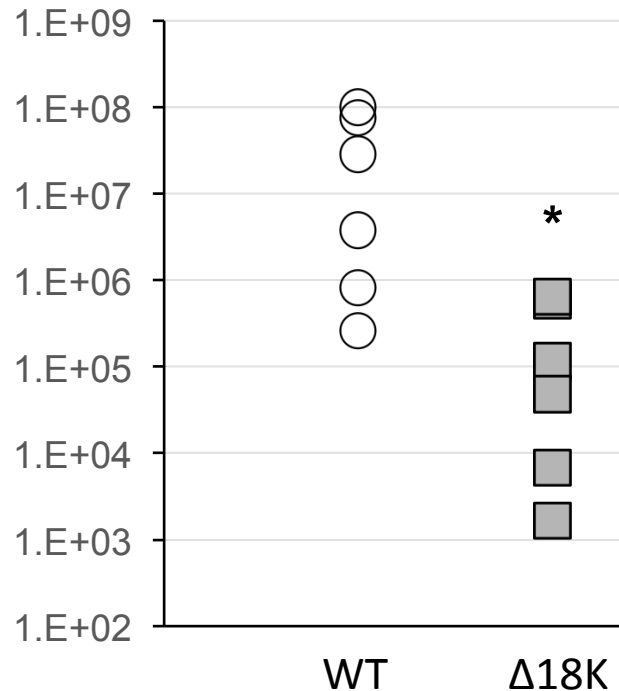

**Viral loads in kidneys of adult *X. laevis* at 6 days post-infection.** Outbred adult frogs were infected by i.p. injection of  $1 \times 10^6$  PFU of WT- or  $\Delta 18$ -FV3 and FV3 genome copy numbers in PLs, kidneys at 6 dpi were determined by absolute qPCR using primers specific for FV3 vDNA Pol II. Results are means  $\pm$  SE of genome copy number/100m of genomic DNA of 6 to animals per group. \*;  $P < 0.05$  significant differences between WT and  $\Delta 18$ K-FV3 using one-way ANOVA test and Tukey's post hoc test.
